# Supplementary material
Source: PubMed Central journal article supplement (PMC4275313)
Supplement: 10-1055-s-0034-1383216-sup_gf854.pdf [file 10-1055-s-0034-1383216-sup_gf854.pdf]

# Erläuterung und Anwendung der kolposkopischen Nomenklatur der IFCPC (International Federation for Cervical Pathology and Colposcopy) Rio 2011

Zu den grundsätzlichen Hinweisen für die Kolposkopie der Cervix uteri – adäquat/inadäquat; Plattenepithel-Zylinderepithelgrenze; Transformationszone

Explanation and Use of the Rio 2011 Colposcopy Nomenclature of the IFCPC (International Federation for Cervical Pathology and Colposcopy)

Comments on the general colposcopic assessment of the uterine cervix: adequate/inadequate; squamocolumnar junction; transformation zone

## Autoren

J. Quaas<sup>2</sup>, O. Reich<sup>1</sup>, V. Küppers<sup>2</sup>

## Institute

<sup>1</sup> Vorstand der Arbeitsgemeinschaft Kolposkopie (AGK, Österreich)

<sup>2</sup> Vorstand der Arbeitsgemeinschaft für Kolposkopie und Zervixpathologie (AGCPC, Deutschland)

## Schlüsselwörter

- Kolposkopie
- Cervix uteri
- Nomenklatur
- IFCPC Rio de Janeiro 2011
- Transformationszone
- adäquate Kolposkopie
- inadäquate Kolposkopie

## Key words

- colposcopy
- cervix uteri
- nomenclature
- IFCPC Rio de Janeiro 2011
- transformation zone
- adequate colposcopy
- inadequate colposcopy

## Bibliografie

**DOI** <http://dx.doi.org/10.1055/s-0034-1383216>  
Geburtsh Frauenheilk 2014; 74:  
1–3 © Georg Thieme Verlag KG  
Stuttgart · New York ·  
ISSN 0016-5751

## Korrespondenzadresse

**Dr. Jens Quaas**  
Sekretär der Arbeitsgemein-  
schaft Zervixpathologie  
& Kolposkopie  
Grünthal 22  
18437 Hansestadt Stralsund  
[dr@jquaas.de](mailto:dr@jquaas.de)  
[www.ag-cpc.de](http://www.ag-cpc.de)

**Priv.-Doz. Dr. med. Volkmar  
Küppers, Facharzt für Frauen-  
heilkunde und Geburtshilfe**  
Zytologisches Labor –  
Dysplasie-Sprechstunde  
Königsallee 64  
40212 Düsseldorf  
[info@dysplasie-praxis.de](mailto:info@dysplasie-praxis.de)

## Zusammenfassung

Im Juli 2012 wurde eine überarbeitete Nomenklatur zur kolposkopischen Untersuchung der Cervix uteri durch die IFCPC verabschiedet. 2012 erfolgte eine durch die Vorstände der Arbeitsgemeinschaft Kolposkopie (AGK, Österreich), der Arbeitsgemeinschaft für Kolposkopie und Zervixpathologie (AGKOL, Schweiz) und der Arbeitsgemeinschaft für Kolposkopie und Zervixpathologie (AGCPC, Deutschland) anerkannte Darstellung mit Empfehlung zur Nutzung für den deutschsprachigen Raum. Die Nomenklatur ist so aufgebaut, dass der Untersucher nach einem bestimmten Schema kolposkopische Kriterien beurteilen soll. Zu Beginn der kolposkopischen Untersuchung wird geprüft, ob die Kolposkopie repräsentativ ist: 1. Ist die Untersuchung als adäquat oder inadäquat (mit Begründung) einzuschätzen? 2. Wie sind die Einsehbarkeit der Plattenepithel-Zylinderepithelgrenze und der Typus der Transformationszone zu bewerten? Im Folgenden wird auf einige Aspekte dieser grundsätzlichen Vorbemerkungen der Nomenklatur eingegangen, die sich im praktischen Gebrauch als klärungsbedürftig erwiesen haben.

## Einleitung

Die aktuelle kolposkopische Nomenklatur wurde am 1.7.2012 in der Zeitschrift „Obstetrics & Gynecology“ publiziert [1]. Im Frauenarzt 2012 [2] und in der Geburtshilfe & Frauenheilkunde 2013 [8] erfolgte eine durch die Vorstände der Arbeitsgemeinschaft Kolposkopie (AGK, Österreich), der Arbeitsgemeinschaft für Kolposkopie und Zervixpathologie (AGKOL, Schweiz) und der Arbeitsgemeinschaft für Kolposkopie und Zervixpathologie (AGCPC, Deutsch-

## Abstract

In July 2012 the IFCPC adopted a revised terminology for colposcopic examinations of the uterine cervix. In 2012, the Boards of the *Arbeitsgemeinschaft Kolposkopie* (AGK – Austrian Society of Colposcopy), the *Arbeitsgemeinschaft für Kolposkopie und Zervixpathologie* (AGKOL – Swiss Society of Colposcopy and Cervical Pathology) and the *Arbeitsgemeinschaft für Kolposkopie und Zervixpathologie* (AGCPC – German Society of Colposcopy and Cervical Pathology) accepted the validity of the 2011 IFCPC nomenclature and recommended its use in general clinical practice across German-speaking countries. The revised nomenclature was devised so that examiners can evaluate colposcopic criteria according to a specific scheme. At the start of the examination, the examiner must assess whether the colposcopy is representative or not. 1. Can the examination be classed as adequate or inadequate (reasons must be given)? 2. How would you describe the visibility of the squamocolumnar junction and categorize the transformation zone? Below we discuss some aspects of this general assessment as outlined in the nomenclature which were found to require further clarification for general practice.

land) anerkannte Darstellung mit Empfehlungen zur Nutzung für den deutschsprachigen Raum. Hervorzuheben ist, dass es ein Anliegen der neuen Nomenklatur der IFCPC ist, einen engeren Zusammenhang zum therapeutischen Vorgehen herzustellen. Beispielgebend hierfür sind die Einführung der Graduierung der Sichtbarkeit der Plattenepithel-Zylinderepithelgrenze oder die im Addendum erwähnten Exzisionstypen. Aus Sicht der Autoren ist dieser Schritt begrüßenswert, ergibt sich hieraus jetzt eine klarere Positionierung im Hinblick auf individuelle The-

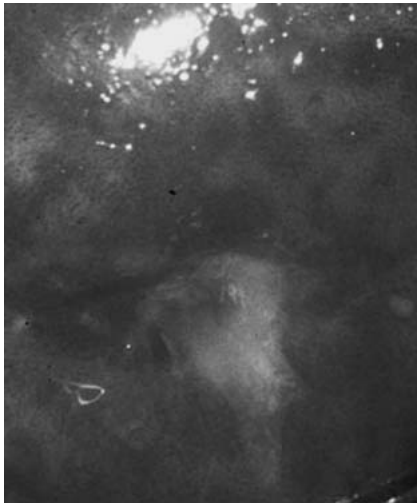

**Abb. 1** Inadäquate kolposkopische Untersuchungsbedingungen, Entzündung.

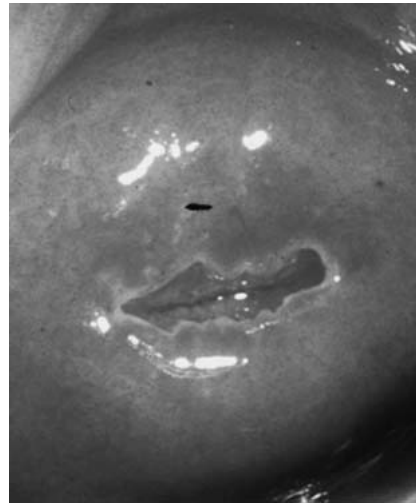

**Abb. 2** Adäquate kolposkopische Untersuchungsbedingungen, Transformationszone Typ 1.

rapieplanung und -durchführung. Siehe hierzu auch entsprechende Arbeiten (z.B. Kühn 2011 [7], Reich & Fritsch 2014 [9]). In der Gesamtsicht hebt die neue kolposkopische Nomenklatur somit die Bedeutung kolposkopischer Untersuchungen deutlicher hervor, als es bei Vorgängerversionen der Fall war.

Erfreulich ist die Tatsache, dass insbesondere 2 aktuelle Publikationen aus dem deutschsprachigen Raum (Scheungraber et al. [3, 4]) Eingang in die Novellierung der Nomenklatur gefunden haben.

Ebenso soll erwähnt werden, dass die in der Nomenklatur festgeschriebene und für die Praxis wichtige Unterscheidung der Lokalisation von Läsionen innerhalb und außerhalb der Transformationszone, ebenso wie die Bedeutung der Oberflächenausdehnung abnormer kolposkopischer Befunde an der Cervix uteri durch Arbeiten aus dem deutschsprachigen Raum grundlegend wissenschaftlich begründet sind [5,6].

Im Folgenden wird auf einige Aspekte eingegangen, die sich im praktischen Gebrauch als klärungsbedürftig erwiesen haben.

### Adäquat oder inadäquat

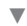

Für die kolposkopische Nomenklatur der Cervix uteri und der Vagina sind grundsätzliche Vorbemerkungen erstellt worden, die von fundamentaler Bedeutung sind: Ist die kolposkopische Untersuchung „adäquat“ (durchführbar) oder „inadäquat“ (nicht durchführbar) mit Begründung. Damit wurden die Begriffe „satisfactory/unsatisfactory colposcopy“ ersetzt. Diese Änderung soll hervorheben, dass bei inadäquater Kolposkopie wegen z.B. Entzündung eine Kontrolluntersuchung nach Therapie durchzuführen

ren ist (● **Abb. 1**). Die Verschiebung der Beurteilbarkeit und der generellen Aussagekraft einer kolposkopischen Untersuchung an den Nomenklaturanfang unterstreicht deren Wertigkeit.

Es ist notwendig, hervorzuheben, dass trotz nicht vollständig einsehbarer Plattenepithel-Zylinderepithelgrenze (Transformationszone Typ 3) adäquate kolposkopische Untersuchungsbedingungen vorliegen können, was meistens der Fall ist (● **Abb. 4**). Adäquate kolposkopische Untersuchungsbedingungen beschreiben also den Zustand, dass die Kolposkopie generell durchgeführt werden kann. Die Beurteilung des Typs der Transformationszone kann nahezu ausschließlich nur unter adäquaten Bedingungen erfolgen (● **Abb. 2**).

### Plattenepithel-Zylinderepithelgrenze und Transformationszone

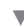

Grundsätzlich erfolgt die Beurteilung der Transformationszone und die Einstufung in die Transformationszonen Typ 1, 2, 3 nach Anwendung von Essigsäure.

Die Transformationszone sieht im nativen Zustand zumeist grau-rot aus. Bei kolposkopischer Betrachtung nach trockener Reinigung werden meist regelmäßig verzweigte und deshalb unauffällige Gefäße sowie Öffnungen von Zervixdrüsen sichtbar. Des Weiteren kann man Ovula Nabothi sehen. Nach Gabe von Essigsäure werden alle Strukturen, bis auf die Gefäße, deutlicher sichtbar. Die Plattenepithel-Zylinderepithelgrenze ist eine scharfe, oft stufenförmige Grenze zwischen dem träubchenförmigen Zylinderepithel und dem metaplastischen Plattenepithel. Sie kann kolposkopisch mehr oder minder sichtbar sein.

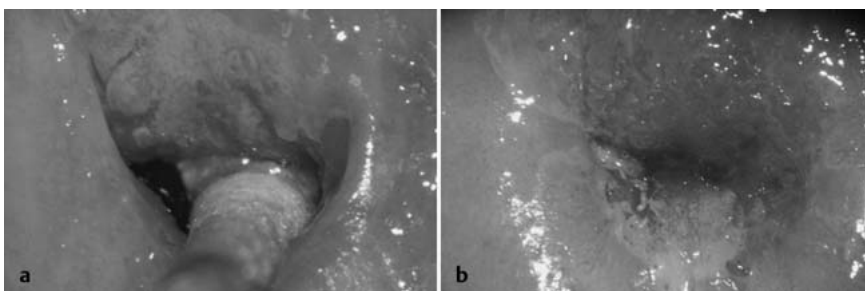

**Abb. 3 a und b** Adäquate kolposkopische Untersuchungsbedingungen, Transformationszone Typ 2.

Das Erkennen der Lokalisation der Plattenepithel-Zylinderepithelgrenze ist die Voraussetzung zur Klassifikation der Transformationszone in Typ 1, 2, 3.

Beide Begriffe (Plattenepithel-Zylinderepithelgrenze, Transformationszone) beschreiben 2 unterschiedliche Aspekte, welche sich jedoch überschneiden. Die Plattenepithel-Zylinderepithelgrenze ist der „innere“ Rand der Transformationszone. Dieser kann „komplett“, „teilweise“ oder gar „nicht sichtbar“ sein. Liegt eine Transformationszone 1 und 2 vor, ist die Plattenepithel-Zylinderepithelgrenze komplett einsehbar.

Bei der Transformationszone Typ 1 ist die Transformationszone komplett ektozervikal gelegen (ohne endozervikalen Anteil) (● Abb. 2). Die Transformationszonen Typ 2 & 3 haben grundsätzlich einen endozervikalen Anteil, das heißt, die Plattenepithel-Zylinderepithelgrenze zieht in den Zervikalkanal. Ist diese komplett sichtbar, so spricht man von einer Typ-2-Transformationszone. Dieser Befund kann mit oder ohne Hilfsmittel (Zervixspreizer) erhoben werden (● Abb. 3 a und b). Lediglich wenn die Plattenepithel-Zylinderepithelgrenze nicht komplett einsehbar ist (auch unter Hinzunahme von Hilfsmitteln), wird die Transformationszone als Typ 3 eingestuft (● Abb. 4). Die Kolposkopie kann in dieser Situation nur eine eingeschränkte Aussage treffen (für den ggf. sichtbaren Teil der Transformationszone), bei grundsätzlich optimalen kolposkopischen Untersuchungsbedingungen ist die Einstufung dennoch als adäquat zu bewerten.

Wie oben erwähnt ist es Anliegen der Nomenklaturkommission der IFCPC, ggf. notwendige Therapieoptionen besser planen zu können. Die Beurteilung beider Aspekte erlaubt dieses besser, z. B. für eine gezielte Exzision der Läsion (Exzisionstyp).

Entsprechend werden im Addendum der Nomenklatur 3 verschiedene Exzisionstypen und auch die Dimensionen des Exzisionspräparats eingeführt. Die Exzisionstypen stellen den praktischen Bezug zu den Typen der Transformationszone dar und sollen die weitere Nutzung der verschiedensten Exzisionstermini durch die Beschreibung der durchgeführten Exzision und nicht die der Methode ersetzen.

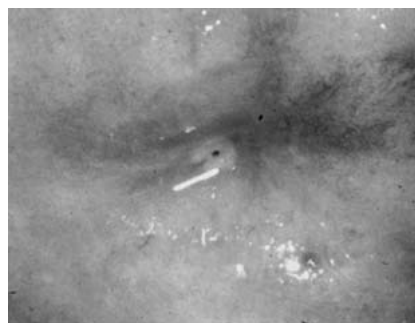

**Abb. 4** Adäquate kolposkopische Untersuchungsbedingungen, Transformationszone Typ 3, eingeschränkte Beurteilbarkeit der Transformationszone.

## Literatur

- 1 Bornstein J, Bentley J, Bösze P et al. 2011 colposcopic terminology of the International Federation for Cervical Pathology and Colposcopy. *Obstet Gynecol* 2012; 120: 166–172
- 2 Girardi F, Frey Tirri B, Küppers V et al. Neue kolposkopische IFCPC-Nomenklatur der Cervix uteri (Rio de Janeiro 2011). *Frauenarzt* 2012; 53: 1064–1065
- 3 Scheungraber C, Glutig K, Fechtel B et al. Inner border—a specific and significant colposcopic sign for moderate or severe dysplasia (cervical intraepithelial neoplasia 2 or 3). *J Low Genit Tract Dis* 2009; 13: 1–4
- 4 Scheungraber C, Koenig U, Fechtel B et al. The colposcopic feature ridge sign is associated with the presence of cervical intraepithelial neoplasia 2/3 and human papillomavirus 16 in young women. *J Low Genit Tract Dis* 2009; 13: 13–16
- 5 Girardi F, Reich O, Tamussino K. *Burghardt's Colposcopy and cervical Pathology*. 4th ed. Stuttgart: Thieme; 2014
- 6 Fritsch H, Hoermann R, Bitsche M et al. Development of epithelial and mesenchymal regionalization of the human fetal utero-vaginal anlagen. *J Anat* 2013; 222: 462–472
- 7 Kühn W. Kolposkopie zur Früherkennung des Zervixkarzinoms. *Pathologie* 2011; 32: 497–504
- 8 Quaas J, Reich O, Frey Tirri B et al. Explanation and use of the colposcopy terminology of the IFCPC (International Federation for Cervical Pathology and Colposcopy) Rio 2011. *Geburtsh Frauenheilk* 2013; 73: 904–907
- 9 Reich O, Fritsch H. The developmental origin of cervical and vaginal epithelium and their clinical consequences: a systematic review. *J Low Genit Tract Dis* 2014; 18: 358–360
